1  
2  
3  
4  
5  
6  
7  
8  
9  
10  
11  
12  
13  
14  
15  
16

Unexpected variation across mitochondrial gene trees and evidence for systematic error:

How much gene tree variation is biological?

Emilie J. Richards<sup>1,2\*</sup>, Jeremy M. Brown<sup>3</sup>, Anthony J. Barley<sup>1</sup>, Rebecca A. Chong<sup>4</sup>, Robert C. Thomson<sup>1</sup>

<sup>1</sup>*Department of Biology, University of Hawai'i, Honolulu, HI, 96822*

<sup>2</sup>*current address: Department of Biology, University of North Carolina, Chapel Hill, NC, 27599*

<sup>3</sup>*Department of Biological Sciences and Museum of Natural Science, Louisiana State University, Baton Rouge, LA, 70803*

<sup>4</sup>*Department of Integrative Biology, University of Texas, Austin, TX, 78705*

\*author for correspondence: [ejr@live.unc.edu](mailto:ejr@live.unc.edu)

17 ABSTRACT

18  
19 The use of large genomic datasets in phylogenetics has highlighted extensive topological  
20 variation across genes. Much of this discordance is assumed to result from biological processes.  
21 However, variation among gene trees can also be a consequence of systematic error driven by  
22 poor model fit, and the relative importance of these biological versus methodological factors in  
23 explaining gene tree variation is a major unresolved question in phylogenetics. Using  
24 mitochondrial genomes to control for biological causes of gene tree variation, we estimate the  
25 extent of gene tree discordance driven by systematic error and employ posterior prediction to  
26 highlight the role of model fit. We find that the amount of discordance among mitochondrial  
27 gene trees is similar to the amount of discordance found in other studies that assume only  
28 biological causes of variation. This similarity suggests that the role of systematic error in  
29 generating gene tree variation is underappreciated and that critical evaluation of the fit between  
30 assumed models and the data used for inference is important for the resolution of unresolved  
31 phylogenetic questions.

32  
33  
34 Keywords –gene tree discordance, phylogenomics, posterior prediction, model adequacy  
35

36           Large genomic datasets are increasingly being used for phylogenetic inference because  
37 they increase statistical power and reduce stochastic error, which can lead to greater phylogenetic  
38 resolution (Rokas et al. 2003; Gee 2003; Rokas and Carroll 2005). The use of these large datasets  
39 has highlighted the extensive topological variation that can be found across genes. For example,  
40 phylogenomic analysis of 1,070 genes from 23 yeast genomes resulted in 1,070 distinct gene  
41 trees (Salichos and Rokas 2013). This discordance is frequently viewed as the outcome of one of  
42 several biological sources of gene variation: incomplete coalescence, horizontal gene transfer,  
43 and gene duplication/loss events in the evolutionary history of genes (reviewed by Maddison  
44 1997; Nakhleh et al. 2013). Explicit modeling of these processes, when possible, can  
45 accommodate this variation during the inference of a species tree (Edwards 2009; Degnan and  
46 Rosenberg 2009; Boussau et al. 2013, Mirarab et al. 2014; Szölloosi et al. 2015, Edwards et al.  
47 2016). However, variation among gene trees can also be a consequence of systematic error that  
48 arises when the model used for estimating the gene tree fits the data poorly. The relative  
49 importance of biological versus methodological factors in explaining gene tree variation is a  
50 major unresolved question in phylogenetics.

51           When the model fails to account for important features of the data, inferences and  
52 measures of confidence can be inaccurate (Huelsenbeck and Hillis 1993; Yang et al. 1994;  
53 Swofford et al. 2001; Huelsenbeck and Rannala 2004; Lemmon and Moriarty 2004; Brown and  
54 Lemmon 2007; Brown and Thomson 2017). Because the complexity of datasets grows with size,  
55 the potential for poor model fit to bias inferences also grows. Increasing dataset size may reduce  
56 stochastic error, but it can also exacerbate systematic error and lead to high confidence in  
57 erroneous phylogenies (Phillips et al. 2004; Delsuc et al. 2005; Jeffroy et al. 2006; Philippe et al.  
58 2011; Kumar et al. 2012). Several cases are now known where different genomic datasets

59 support conflicting phylogenetic hypotheses with very high statistical support (e.g. Dunn et al.  
60 2008; Philippe et al. 2009; Schierwater et al. 2009; Whelan et al. 2015), sometimes implying  
61 very different scenarios for the evolution of important traits (e.g., the origin of nervous systems).  
62 The relative roles of biological variation and systematic error in causing this conflict is not yet  
63 well understood.

64         One challenge with evaluating the contributions of systematic error to gene tree  
65 discordance is that biased inferences are difficult to detect reliably given that the true  
66 evolutionary history among most taxa is unknown. However, we can greatly reduce the  
67 confounding effects of biological processes on our ability to identify systematic error by making  
68 use of the mitochondrial genome as a model system. The entire mitochondrial genome is  
69 expected to have the same evolutionary history because it is haploid and uniparentally inherited,  
70 so recombination does not typically occur. While recombination and biparental inheritance have  
71 been documented in animal mitochondrial genomes, these occurrences appear to be rare relative  
72 to the ubiquity of such events in nuclear genomes (reviewed in White et al. 2008). Therefore,  
73 analyses using individual mitochondrial genes should result in concordant gene trees. Conflict  
74 among topologies arising from different mitochondrial genes would therefore most easily be  
75 explained by systematic error during inference of gene trees.

76         While biased inferences are often difficult to identify directly, several approaches have  
77 been proposed to detect poor fit between models and data (e.g. Goldman 1993; Huelsenbeck et  
78 al. 2001; Bollback 2002; Nielsen 2002; Foster 2004; Rodrigue et al. 2009; Ripplinger and  
79 Sullivan 2010; Brown 2014; Reid et al. 2014; Slater and Pennell 2014; Doyle et al. 2015;  
80 Duchêne et al. 2015; Barley and Thomson 2016; Gruenstaeudl et al. 2016; Duchêne et al. 2017).  
81 When fit is poor, the potential exists for inferences to be biased. However, not all instances of

82 poor fit will result in erroneous phylogenetic estimates. Comparison of inferred gene trees and  
83 measures of model fit across tightly linked mitochondrial genes offers a unique opportunity to  
84 understand how the outcome of model fit tests relate to gene tree variation driven by systematic  
85 error. One natural approach to conducting such tests in a Bayesian framework is known as  
86 posterior prediction, wherein samples from a posterior distribution are drawn and used to  
87 simulate many replicated 'predictive' datasets. By comparing the predictive to the empirical  
88 datasets in various ways, the extent to which the model captures salient features of the data can  
89 be studied.

90 Here we analyze mitochondrial genomes for a large set of tetrapod species to characterize  
91 the extent of gene tree discordance and, using posterior prediction, begin to explore how model  
92 fit may contribute to this discord. We find that the amount of discordance among mitochondrial  
93 gene trees is similar to the amount of discordance found in studies of nuclear gene tree variation  
94 where such discordance is assumed to result from biological factors. We were able to detect  
95 systematic error related to discordance among the gene trees in this study using posterior  
96 predictive assessments. However, more work is needed to determine specific causes of poor  
97 model fit and how these drive systematic error.

98

99 METHODS

100 *Datasets*

101 We obtained all available (as of July 31<sup>st</sup> 2014) whole tetrapod mitochondrial genome  
102 sequences from GenBank, which we organized into six datasets comprising the major lineages  
103 within the clade: Crocodylians (n=20), Turtles (n=53), Squamates (n=120), Amphibians (n=157),  
104 Birds (n=253), and Mammals (n=575). We extracted all 13 protein-coding genes from each

105 mitochondrial genome based on GenBank genome annotations. Multiple sequence alignments  
106 were then constructed based on translated codons for each mitochondrial protein-coding gene in  
107 each dataset using the MUSCLE algorithm implemented in Geneious v 8 (Edgar 2004; Kearse et  
108 al. 2012).

### 109 *Initial phylogenetic analyses*

110 For the initial phylogenetic analysis of each of the 78 gene alignments (i.e., 6 clades x 13  
111 genes), we selected a best-fitting substitution model according to the Akaike Information  
112 Criterion (Akaike 1974) corrected for small sample size (AICc) implemented in jModelTest v  
113 2.2 (Darriba et al. 2012). Details on the specific model chosen for each gene alignment and  
114 alignment lengths are provided in Table S1. We first obtained posterior distributions of trees and  
115 other parameters for each alignment using Markov chain Monte Carlo (MCMC) as implemented  
116 in MrBayes v 3.2.5, with the selected model and default prior settings (Ronquist et al. 2012). For  
117 each analysis, we used two independent runs (each with four Metropolis-coupled chains) and  
118 saved the state of the chains every 1000 generations. The MCMC was run until the postburn-in  
119 posterior distributions for each analysis contained 10,000 converged samples. We checked for  
120 convergence of the continuous parameters using Tracer v 1.6 (Rambaut et al. 2014) and  
121 considered a run converged when traces for all parameters appeared to be sampling from a  
122 stationary distribution and had ESS values above 1000. We assessed convergence of the tree  
123 topology using the R package rWTYv 0.1 (Warren et al. 2017). Runs were considered converged  
124 when the bipartition posterior probabilities in the MCMC chain reached a stationary frequency in  
125 the cumulative plots and showed strong correlations (Pearson's  $r > 0.9$ ) across runs.

### 126 *Characterization of gene tree heterogeneity*

127           To characterize the extent of gene tree heterogeneity among the thirteen genes for a given  
128 clade, we calculated three different types of summary trees (majority-rule consensus tree, 95%  
129 consensus tree, and maximum clade credibility tree) from the posterior distribution for each gene  
130 and then calculated the number of incompatible splits among these gene tree estimates. We then  
131 calculated the number of incompatible splits between each pair of gene trees for a given clade  
132 (Doyle et al. 2015; available from <https://github.com/vinsondoyle/treeProcessing>). This measure  
133 is related to the more widely used Robinson-Foulds (RF) distance (Robinson and Foulds 1981),  
134 but focuses on incompatibilities rather than bipartitions that are present in one tree but not the  
135 other. The practical effect of this change is that polytomies do not contribute to the distance.  
136 Because we are primarily interested in identifying strongly supported differences among gene  
137 trees, this was a useful property for our study. The distributions of pairwise tree-to-tree distances  
138 among genes were then visualized with violin plots using the R package ggplot2 v2.1.0  
139 (Wickham 2009). Since we were interested in distinguishing differences among gene trees that  
140 were strongly supported (and are more likely to be driven by systematic error) from those that  
141 had little statistical support (and may simply arise from stochastic error), we focused on  
142 discordance between 95% consensus trees (calculated using Dendropy v 4.0.3; Sukumaran and  
143 Holder 2010) for the rest of the analyses in this study.

144           We also visually assessed gene tree heterogeneity by looking for non-overlapping sets of  
145 topologies among the thirteen genes in a low-dimensional projection of tree space created with  
146 non-linear dimensionality reduction (NLDR) using Treescaper v 1.0.0 (Huang et al. 2016;  
147 Wilgenbusch et al. 2017). Two-dimensional projections were created for each clade based on  
148 pairwise RF tree-to-tree distances of 3,250 trees taken from the posterior distributions of all

149 genes (250 trees per gene) using the curvilinear component analysis (CCA) and stochastic  
150 gradient decent (SGD) optimization recommended in Wilgenbusch et al. (2017).

151 *Model performance assessment*

152 We assessed the absolute fit of the selected models to their respective gene alignments by  
153 performing posterior predictive assessments with both data- and inference-based test statistics.  
154 Data-based test statistics measure some characteristic of the data itself (e.g., the frequency  
155 distribution of site patterns in the alignment or variation in base composition across taxa;  
156 Goldman 1993, Huelsenbeck et al. 2001) and inference-based test statistics measure some  
157 characteristic of the resulting inference (e.g., width of the posterior distribution of trees; Brown  
158 2014). A list of the test-statistics used in this study and brief descriptions of what they measure  
159 are provided in Table 1.

160 For the data-based assessments, posterior predictive simulation of datasets for each gene  
161 was performed using PuMA v0.909 (Brown and EIDabaje 2009) and SeqGen v1.3.2 (Rambaut  
162 and Grassly 1997) with 1000 parameter values and trees drawn uniformly from postburn-in  
163 MCMC samples. The data-based test statistics require that missing data be excluded from the  
164 alignments, so we removed missing data from sequences prior to simulation using PAUP\*  
165 v4.0b10 (Swofford 2003). Using each set of 1,000 posterior predictive datasets and the  
166 corresponding empirical dataset, we conducted two data-based assessments of model  
167 performance to characterize the ability of the model to replicate features of the empirical dataset.  
168 The multinomial likelihood test statistic (Goldman 1993; Bollback 2002; Table 1) was calculated  
169 using PuMA (Brown and EIDabaje 2009) and the  $\chi^2$  statistic (Table 1) was calculated using the  
170 P4 python phylogenetics package (Foster 2004).



171 For the inference-based assessments, we repeated the posterior predictive simulation of  
172 datasets for each gene alignment including missing data, with 100 parameter values and trees  
173 drawn uniformly from post-burnin MCMC samples. Only 100 posterior predictive datasets were  
174 used for these tests due to the much higher computational demands involved in the inference-  
175 based assessments. For each posterior predictive dataset, we obtained a posterior distribution of  
176 trees and other parameters using MrBayes v 3.2.5 (Ronquist et al. 2012) with the model and  
177 priors assumed during analysis of the empirical data. To assess convergence, we chose five  
178 replicates at random from each gene and performed the same convergence analysis used in the  
179 initial phylogenetic analyses. When all five replicates met the convergence criteria described  
180 above, the remaining 95 predictive phylogenetic analyses were considered to have converged if  
181 the average standard deviation of split frequencies also fell below 0.01. All inference-based test  
182 statistics that were proposed in Brown (2014) were calculated in this study (Table 1) using AMP  
183 (Brown 2014, available from <https://www.github.com/jembrown/amp>) on a random sample of  
184 10,000 topologies from the post-burnin posterior distribution generated for a given posterior  
185 predictive dataset. After test statistic values were calculated, we quantified the position of the  
186 empirical value relative to the posterior predictive distribution for each test using effect sizes  
187 (Doyle et al., 2015). Effect sizes for each test statistic were calculated as the absolute value of the  
188 difference between the empirical and the median posterior predictive value divided by the  
189 standard deviation of the posterior predictive distribution. These effect sizes are hereafter  
190 referred to as posterior predictive effect sizes (PPES).

### 191 *Correlation among measures of model performance*

192 For each dataset, we ranked genes according to the model performance results and then  
193 tested for correlations among the rankings. This allowed us to assess whether the test statistics

194 generally agreed on model performance for each gene. To do so, we calculated the rank for each  
195 gene for each test statistic based on PPES and then calculated pairwise Spearman's rank  
196 correlation coefficients between test statistics using the R package 'stats' v3.2.2 (R Core Team  
197 2015). For all pairwise combinations, we then selected one of the pair of test statistics at random  
198 and randomly shuffled its ranking of genes, recalculating the correlation coefficient. We repeated  
199 this procedure 1,000 times in order to create a null distribution of correlation coefficients and  
200 assess the significance of the observed correlation. Correlations among test statistics were  
201 considered significant if less than 5% of the coefficients from the randomized rankings were  
202 greater than or equal to the correlation coefficient from the observed rankings.

### 203 *The Relationship Between Model Fit and Gene Tree Variation*

204 As a rough measure of accuracy in the gene tree estimates, we were interested in  
205 quantifying how different the gene trees for each clade were from widely accepted estimates of  
206 phylogeny from the literature, as well as how this might relate to measures of model  
207 performance. To do so, we selected a 'reference tree' from the literature for each clade that we  
208 could use as the current best estimate for that clade (Crocodilians: Oaks et al. 2011; Turtles:  
209 Thomson and Shaffer 2009; Squamates: Wiens et al. 2012; Amphibians: Pyron et al. 2011;  
210 Birds: Prum et al. 2015; Mammals: Meredith et al. 2011). Each reference tree was selected based  
211 on the availability of its posterior distributions/summary trees for analysis and similarity in taxa  
212 to those used in this study. Because we are primarily interested in strongly supported differences,  
213 we calculated the number of incompatibilities between the 95% consensus tree for each gene to  
214 the reference tree, trimming taxa as necessary so that taxon sampling matched between the two  
215 trees. We then carried out linear regression between the tree distance and the PPES for each gene  
216 and model performance test.

217

218

## RESULTS

219

### *Agreement among gene trees from initial phylogenetic analyses*

220

221

222

223

224

225

226

227

228

229

230

231

232

233

234

235

236

237

238

239

Extensive gene tree heterogeneity was present across all datasets (Fig 1). Across all datasets and consensus methods, the number of incompatibilities between genes was much greater than 0, with the exception of the Crocodilian dataset, where most genes had identical 95% consensus gene trees. The amount of disagreement varied across the types of summary tree in a way that would be expected. Maximum clade credibility trees are the most highly resolved of the summary trees, but can contain many weakly supported nodes. Thus, stochastic error in the tree estimate will increase tree-to-tree distances relative to other types of summary trees. Conversely, the 95% consensus contains fewer nodes, although all have strong support, leading to comparatively smaller tree-to-tree distances. In this latter case, the tree-to-tree distance is more likely to highlight differences that can only be explained by systematic error. Among the 95% consensus trees, tree-to-tree distances were also substantially greater than zero, indicating the presence of strongly supported yet conflicting topologies among genes. In the Crocodilian dataset containing 20 species, the majority of gene trees were well resolved and largely congruent. The conflicts among the Crocodilian gene trees occurred only among species-level relationships at the tips of the phylogenies. Gene trees for the larger datasets were less well resolved, and conflicts among gene trees in the resolution of deeper relationships were more frequent.

We find similar patterns of gene tree heterogeneity in our low-dimensional projections of tree space across genes for each dataset (Fig 2). In all datasets except Crocodilians, we observe thirteen distinct clusters of trees sampled from the posterior distributions of different genes.

240 Some of these clusters are clearly separated from other clusters (e.g. the cluster representing  
241 ND5 gene trees in the Turtle dataset), suggesting strong incongruence with other sets of gene  
242 trees.

243 This unanticipated level of gene tree heterogeneity across tightly linked mitochondrial  
244 genes is qualitatively similar to that found in other studies of nuclear gene tree heterogeneity  
245 (Table 2). Some of these studies (e.g. Salichos and Rokas 2013) state the observed heterogeneity  
246 could have been caused by either biological or methodological sources, and that it is nearly  
247 impossible to determine their relative contributions. Other studies (e.g. Song et al. 2012; Zhong  
248 et al. 2013; Pease et al. 2016) attribute the heterogeneity to biological factors, mainly incomplete  
249 lineage sorting, and either rule out or do not consider systematic bias as a contributing factor.  
250 Most of the above-mentioned studies characterized the extent of gene tree heterogeneity by  
251 calculating pairwise Robinson-Foulds distances among majority rule consensus trees of each  
252 locus in their dataset. We also find high levels of gene tree discordance in our mitochondrial  
253 datasets when we use similar methods for characterizing gene tree heterogeneity (Table 2),  
254 indicating that systematic bias can cause similarly extensive amounts of gene tree variation that  
255 are typically attributed to biological sources of variation.

256  
257  
258  
259

### *Model Performance Assessments*

260 The posterior predictive effect sizes resulting from the 12 model performance tests varied  
261 across genes and datasets, ranging from 0 to  $1.12 \times 10^{12}$  (Table 3, S2-S7). This wide range is  
262 heavily influenced by entropy, one of the inference-based test statistics, which exhibited little to  
263 no variance between posterior predictive simulations, such that small differences between the  
264 empirical and median of the posterior predictive distributions lead to extremely large PPES

265 values for some genes in all but the Crocodylians dataset. This behavior of the test statistic stems  
266 from sensitivity to dataset size and the complexity of sampling very large tree spaces, where the  
267 coarseness of MCMC sampling makes it improbable to sample any individual topology more  
268 than once. In conventional phylogenetic analyses, where node probabilities are of primary  
269 interest, this issue is solved simply by summing up how frequently different bipartitions are  
270 sampled, rather than whole topologies. However, it becomes problematic when focusing on the  
271 frequencies of unique topologies, as we do here with the entropy test statistic. While large PPES  
272 for entropy might be meaningful for smaller datasets, it is not clear that they represent extremely  
273 poor fit between the model and the data for many of the large trees sampled here, where almost  
274 every topology sampled in the posterior is unique.

275         When entropy was excluded, data-based test statistics appeared to reject model fit among  
276 genes more strongly than inference-based test statistics across all six datasets, with larger PPES  
277 on average (Table 4). This result makes sense, since poor model fit must manifest itself at the  
278 level of the data in order for inferences to be affected, but not all model deficiencies noticeable in  
279 the data will affect inference. PPES ranged from 0.002 to 110.78, indicating a large range of  
280 model fit to the empirical data. The range of PPES for inference-based test statistics was smaller  
281 than for data-based test statistics and this range varied across datasets (Table 4). For  
282 Crocodylians, PPES across inference-based test statistics were typically small, ranging from 0 to  
283 3.16 (Table 4 and S2), suggesting that the selected models appear to fit the Crocodylian gene  
284 alignments better than for the other datasets, although this may be due to differences in power of  
285 the test statistics to detect poor model performance across datasets of different sizes. For Turtles,  
286 PPES ranged from 0 to 14.25 (Table 4 and Table S3), indicating a mixture of model fit. Similar

287 patterns of a mixture of model fit across genes were also found for the larger datasets of  
288 Squamates, Amphibians, Birds, and Mammals (Table 4, S4-7).

289

### 290 *Correlation Among Measures of Model Performance*

291 Across all datasets, gene rankings were significantly correlated among the quantile-based  
292 test statistics that compare the support and similarity of trees across the empirical and predicted  
293 posterior distributions (Fig 3). Within the Crocodylian and Squamate datasets, the gene rankings  
294 for the mean and variance of tree length were significantly correlated with each other. Within the  
295 Crocodylian dataset, gene rankings based on entropy were correlated with gene rankings among  
296 the quantile-based test statistics. We observed a few other correlations, although these were  
297 largely weak and idiosyncratic among datasets (Fig 3).

298

### 299 *The Relationship Between Model Fit and Gene Tree Variation*

300 The amount of strongly supported conflict between gene trees and reference trees varied  
301 across datasets and was low overall for Crocodylians and Birds and somewhat higher in the other  
302 clades (Table 5). There was no simple overall relationship between tree distance and PPES (Fig  
303 4, Table S8). Although genes did vary in their PPES, increasing PPES did not necessarily  
304 correspond to decreasing congruence between gene trees and reference trees across all datasets.  
305 However, we did observe some significant positive correlations between PPES and incongruence  
306 with the reference tree (e.g. for the 999-1,000<sup>th</sup> and 9999-10,000<sup>th</sup> quantile-based test statistic in  
307 the Turtle dataset; Figure 4). We also observed some significant negative correlations in the  
308 same test statistics for the Crocodylian and Bird datasets. The negative relationships in these  
309 datasets may have to do with the combined effects of (1) a lack of strong disagreement among

310 the gene trees and the reference tree (Table 5) and (2) an interaction between the power of a test  
311 statistic to detect poor model performance with the power of a gene to precisely estimate the  
312 phylogeny (i.e., the shortest genes often have the smallest PPES as well as the fewest  
313 incompatibilities with the reference tree due to lack of information rather than poor fit of the  
314 model).

315         While the relationship between poor model fit and topological conflict between the gene  
316 trees and reference tree appears to be complex, we do find several cases where these methods  
317 clearly identified systematic bias or other issues in the data. While inspecting PPES results, we  
318 noted two cases where a single gene was a large outlier for one or more model performance tests  
319 relative to all genes (Fig 5). In both cases the PPES outlier was correctly signaling an issue in the  
320 analysis. Specifically, phylogenetic analysis of cytochrome-B (CYTB) in the Squamate dataset  
321 inadvertently included a misaligned region that affected four sequences. This misalignment  
322 increased the tree length mean and variance PPES for this gene, which were consequently much  
323 larger than these values for all other genes in the dataset (Fig 5A). The error also drove a  
324 spurious phylogenetic result that united a worm lizard with several blindsnakes as a (clearly  
325 erroneous) clade. Once we corrected the misalignment, the tree length mean and variance PPES  
326 for CYTB were drastically reduced and the position of these taxa in the gene tree returned to  
327 their more commonly accepted positions.

328         The quantile-based test statistics that measure the spread of the distribution of trees  
329 within the posterior distribution also detected clear systematic error in the inference of the Turtle  
330 ND5 gene tree. The ND5 PPES for the 99-100th, 999-1000th, and 9999-10000th quantiles were  
331 at least twice as large as any other gene (Fig 5B). The gene tree for ND5 supports a  
332 fundamentally different backbone of family-level relationships among turtles and contains a

333 large number of topological conflicts with the reference tree in comparison to the rest of the gene  
334 trees in the Turtle dataset (Table 5). Because the backbone relationships of turtles are well  
335 established (Thomson and Shaffer 2010; Barley et al. 2010; Crawford et al. 2015, Shaffer et al.  
336 2017), we are confident that the ND5 gene tree is being influenced by systematic error.  
337 Supporting this, there was a significant positive correlation between the number of  
338 incompatibilities and model performance based on the quantile-based test statistics for this  
339 dataset (Fig 4, Table S8).

340

## 341 DISCUSSION

342 Our analysis highlights several issues that should influence methodological choices for  
343 researchers moving forward. Most significantly, we find that the amount of gene tree variation in  
344 empirical data can be large, irrespective of whether biological sources of gene tree variation (i.e.  
345 incomplete lineage sorting) are expected to play a significant role. The gene tree heterogeneity  
346 observed in this study is qualitatively similar to other studies that attribute the variation solely to  
347 biological processes. This similarity suggests that the observation of variation among gene trees  
348 in empirical data should not necessarily be ascribed to biological sources by default and  
349 researchers should take care to check for more prosaic explanations of gene tree variation in their  
350 data (i.e. poor model fit driving systematic error) before applying a hierarchical model of gene  
351 tree variation (and assuming it can adequately account for this variation). 'Species tree'  
352 approaches to analyzing multilocus alignments typically assume that the only source of  
353 discordance is biological (i.e. coalescent stochasticity). Other factors, such as discordance caused  
354 by poor model fit at the DNA sequence level, can contribute to gene tree heterogeneity and  
355 mislead these approaches (e.g. see Scornavacca et al. 2017 for an example where incomplete



356 lineage sorting is only a minor cause of observed phylogenetic discordance in placental  
357 mammals). With increasing application of genomic data and the strong statistical power it  
358 provides for phylogenetic inference, it is important that researchers take into account both  
359 methodological and biological sources of gene tree conflict in the effort to produce accurate,  
360 highly supported trees.

361         The combination of pervasive gene tree variation coupled with the substantial evidence  
362 for systematic error suggests that, even in genomes that have been characterized and analyzed  
363 extensively (such as the mitochondrial genome), phylogenetic analyses still have the potential to  
364 be substantially mislead. In larger datasets, such as those that sample hundreds or thousands of  
365 less well characterized loci from the nuclear genome, this potential grows further. The utility of  
366 the mitochondrion for this study is that we have a strong *a priori* expectation that gene trees will  
367 be concordant in the absence of poor model fit. This expectation does not hold for larger nuclear  
368 datasets, so detecting these issues is consequently both more difficult and more critical. We  
369 attempted to use variation in model fit to sort genes into those that are more or less reliable, but  
370 found that this relationship was too complex relative to the small number of genes in the  
371 mitochondrial genome to allow for such coarse characterization. Nevertheless, this approach  
372 does appear to be fruitful when more loci are available (Doyle et al. 2015).

373         Model fit tests employing posterior predictive simulation, and related approaches, have  
374 the potential to fill an important gap in phylogenetic methodology by assessing a model's fit to a  
375 given dataset. Model fit testing in a posterior predictive framework allows a great deal of  
376 flexibility to focus on different aspects of a model and their influence on inferences. In this  
377 study, we conducted a suite of model performance tests to explore possible sources of systematic  
378 error that may be driving extensive gene tree variation. Across several datasets, we were able to

379 detect the presence of systematic error with some of the test statistics, particularly the upper  
380 quantile-based test statistics. However, the relationship between model performance and tree-to-  
381 tree distances appears to be more complex than a simple linear correlation.

382 This complex relationship may stem from poor performance across all genes, leading to  
383 consistent or very subtly different levels of error across gene trees and difficulty in detecting a  
384 relationship with gene tree congruence. Alternatively, poor model performance in some genes  
385 may result in many subtle errors in estimated support for relationships in the posterior  
386 distribution that lead to large PPES values from the predictive datasets, but not result in any one  
387 part of the tree strongly conflicting with the reference (e.g. discordance among nodes deeper in  
388 the tree that cause larger tree-to-tree distances). It is also possible that the true mitochondrial  
389 history in some of these datasets, especially those that have undergone rapid radiation, may be  
390 different than the true species history.

391 The specific causes of poor model fit, and their role in producing systematic error, were  
392 difficult to determine with the model performance tests used here. The implementation of more  
393 site-specific and branch-specific test statistics in the posterior predictive framework could help  
394 pinpoint the specific causes of poor model fit and the regions of the tree that are most directly  
395 affected. Our difficulty with determining the sources of systematic error in this study may also  
396 stem from issues with the power of these tests to detect poor performance, as they might  
397 represent conservative measures of poor model performance (Bollback 2005, Ripplinger and  
398 Sullivan 2010, Brown 2014). The power of posterior predictive tests to detect poor model  
399 performance in a gene and the power of the gene to precisely estimate the phylogeny are  
400 probably correlated. Precise characterization of this relationship will require simulation studies  
401 beyond the scope of this paper.

402

403

## CONCLUSIONS

404           Gene tree heterogeneity in multilocus studies is often assumed to stem from biological  
405 processes, such as incomplete lineage sorting or horizontal transfer, and several methods have  
406 been developed to model these types of variation. We demonstrate that systematic error can be as  
407 significant a source of variation among gene trees as biological sources, although it is not  
408 currently standard practice to check for this. The posterior predictive framework for model  
409 performance assessment has the potential to fill this important gap in current phylogenetic  
410 methodology and provides researchers with a great deal of flexibility in testing different aspects  
411 of model fit. With increasing application of genomic data and the strong statistical power it  
412 provides for phylogenetic inference, it is important that researchers better take into account the  
413 methodological sources of gene tree conflict alongside the biological in the effort to produce  
414 accurate, highly supported trees.

415

416

## SUPPLEMENTARY MATERIAL

417 Data files and other supplementary information related to this article have been deposited at  
418 Dryad under doi:XXX

419

420

## FUNDING

421 Funding for this work was provided by a UH Evolution, Ecology, and Conservation Biology  
422 Meredith-Carson Fellowship to EJR, an Arnold O. Beckman Postdoctoral Fellowship to AJB,  
423 and NSF awards DEB-1355071 and DBI-1262571 to JMB, as well as DEB-1354506 and DBI-  
424 1356796 to RCT.

425

426

#### ACKNOWLEDGMENTS

427 We utilized high-performance computing resources from the University of Hawai'i (UH) and

428 Louisiana State University (LSU) for many of the analyses conducted in this study. We thank

429 Floyd Reed and Peter Marko for comments and advice that improved the manuscript.

430

431

#### REFERENCES

432 Akaike H. 1974. A new look at the statistical model identification. *IEEE Trans. Autom.*

433 *Control.* 19(6): 716-723.

434 Barley, A.J., Spinks, P.Q., Thomson, R.C., Shaffer H.B. 2010. Fourteen nuclear genes provide

435 phylogenetic resolution for difficult nodes in the turtle tree of life. *Mol. Phylogenet. Evol.*

436 55, 1189–94.

437 Barley, A.J., Thomson R.C. 2016. Assessing the performance of DNA barcoding using posterior

438 predictive simulations. *Mol Ecol.* 25:1944-1957.

439 Bogdanowicz D., Giaro K. 2012. Matching split distance for unrooted binary phylogenetic

440 trees. *Trans. Comp. Biol. Bioinf.* 9: 150-160.

441 Bollback J. P. 2002. Bayesian model adequacy and choice in phylogenetics. *Mol. Biol. Evol.*

442 19:1171–1180.

443 Bollback J. P. 2005. Posterior Mapping and Posterior Predictive Distributions. *Statistical*

444 *Methods in Molecular Evolution.* Springer New York: 439-462.

- 445 Boussau B., Szollosi G.J., Duret L., Gouy M., Tannier E., Daubin V. 2013. Genome-scale  
446 coestimation of species and gene trees. *Genome Res.* 23, 323–330.
- 447 Brown J. M. 2014. Detection of implausible phylogenetic inferences using posterior predictive  
448 assessment of model fit. *Syst. Biol.* 63:334–348.
- 449 Brown J.M., Lemmon A.R. 2007. The importance of data partitioning and the utility of Bayes  
450 factors in Bayesian phylogenetics. *Syst. Biol.* 56:643-655.
- 451 Brown J.M., ElDabaje R. 2009. PuMA: Bayesian analysis of partitioned (and unpartitioned)  
452 model adequacy. *Bioinformatics* 25:537-538.
- 453 Brown J.M., R.C. Thomson. 2017. Bayes factors unmask highly variable information content,  
454 bias, and extreme influence in phylogenomic analyses. *Syst. Biol.* 66:517-530.
- 455 Crawford, N.G., Parham, J.F., Sellas, A.B., Faircloth, B.C., Glenn, T.C., Papenfuss, T.J.,  
456 Henderson, J.B., Hansen, M.H., Simison, W.B., 2015. A phylogenomic analysis of  
457 turtles. *Mol. Phylogenet. Evol.* 83, 250–257.
- 458 Darriba D., Taboada G.L., Doallo R., Posada D. 2012. jModelTest2: more models, new  
459 heuristics, and parallel computing. *Nature Methods* 9: 772.
- 460 Delsuc F., Brinkmann H., Philipps H. 2005. Phylogenomics and the reconstruction of the tree of  
461 life. *Nature Rev. Genet.* 6:361-375.

- 462 Duchêne D.A., Duchêne S., Holmes E.C., Ho S.Y.W. 2015. Evaluating the adequacy of  
463 molecular clock models using posterior predictive simulations. *Mol. Biol. Evol.* 32:2986-  
464 2995.
- 465 Duchêne D.A., Duchêne S., Ho S.Y.W. 2017. New statistical criteria detect phylogenetic bias  
466 caused by compositional heterogeneity. *Mol. Biol. Evol.* 34:1529-1534.
- 467 Dunn, C. W., Hejnol A., Matus D. Q., Pang K., Browne W. E., a Smith S., Seaver E., Rouse G.  
468 W., Obst M., Edgecombe G. D., Sørensen M. V., Haddock S. H. D., Schmidt-Rhaesa A.,  
469 Okusu A., Kristensen R. M., Wheeler W. C., Martindale M. Q., Giribet G. 2008. Broad  
470 phylogenomic sampling improves resolution of the animal tree of life. *Nature* 452:745–  
471 749.
- 472 Edgar R. 2004. MUSCLE: multiple sequence alignment with high accuracy and high  
473 throughput. *Nucleic Acids Res.* 32: 1792-1797.
- 474 Edwards S.V. 2009. Is a new and general theory of molecular systematics emerging? *Evolution.*  
475 63:1-19.
- 476 Foster P.G. 2004. Modeling compositional heterogeneity. *Syst. Biol.* 53:485-495.
- 477 Gee H. 2003. Evolution: ending incongruence. *Nature* 425:782.
- 478 Gelman A., Carlin J.B., Stern H.S., Dunson D.B., Vehtari A., Rubin D.B.. 2014. Bayesian data  
479 analysis. CRC press.
- 480 Goldman N. 1993. Statistical tests of models of DNA substitution. *J. Mol. Evol.* 182–198

- 481 Gruenstaeudl M., Ried N.M, Wheeler G.L., Carstens B.C. 2016. Posterior predictive checks of  
482 coalescent models: P2C2M, an R package. *Mol Ecol Resour.* 16: 193-205.
- 483 Huang W., Zhou G., Marchand M., Ash J.R., Morris D., Van Dooren P., Brown J.M., Gallivan  
484 K.A., Wilgenbusch J.C. 2016. Treescaper: Visualizing and extracting phylogenetic signal  
485 from sets of trees. *Mol. Biol. Evol.* 33:3314-3316.
- 486 Hueslenbeck J.P., Rannala B. 2004. Frequentist properties of Bayesian posterior probabilities of  
487 phylogenetic trees under simple and complex substitution models. *Syst. Biol.* 53:904-913.
- 488 Huelsenbeck J.P., Hillis D.M. 1993. Success of phylogenetic methods in the four-taxon case. *Syst.*  
489 *Biol.* 42:247-264.
- 490 Huelsenbeck J. P., Ronquist F., Nielsen, R., Bollback J. P. 2001. Bayesian inference of  
491 phylogeny and its impact on evolutionary biology. *Science* 294:2310–2314.
- 492 Jeffroy O., Brinkmann H., Delsuc F., Philipps H. 2006. Phylogenomics: the beginning of  
493 incongruence? *Trends Genet.* 22:225–231.
- 494 Jennings W.B., Edwards S.V., Hey J. 2005. Speciation history of Australian grass finches  
495 (*Poephila*) inferred from thirty gene trees. *Evol.* 59.9: 2033-2047.
- 496 Kearse M., Moir R., Wilson A., Stone-Havas S., Cheung M., Sturrock S., Buxton S., Cooper A.,  
497 Markowitz S., Duran C., Thierer T., Ashton B., Mentjiles P., Drummond A. 2012.  
498 Geneious Basic: an integrated and extendable desktop software platform for the  
499 organization and analysis of sequence data. *Bioinformatics.* 28: 1647-1649.

- 500 Kumar S., Filipski A.J., Battistuzzi F.U., Kosakovsky S.L., Tamura K. 2011. Statistics and truth  
501 in phylogenomics. *Mol. Biol. Evol.* Doi:10.1093/molbev/msr202
- 502 Lemmon A.R.,Moriarty E.C. 2004. The importance of proper model assumptions in Bayesian  
503 phylogenetics. *Syst. Biol.* 53:265-277.
- 504 Maddison W.P. 1997. Gene trees in species trees. *Syst. Biol.* 46: 523:536.
- 505 Nakhleh L. 2013. Computational approaches to species phylogeny inference and gene tree  
506 reconciliation. *Trends Ecol. Evol.* 28:719-728.
- 507 Nielsen R. 2002. Mapping mutations on phylogenies. *Syst. Biol.* 51:729–739.
- 508 Nylander J.A.A., Wilgenbusch J.C., Warren D.L. Swofford D.L. 2008. AWTY (are we there  
509 yet?): a system for graphical exploration of MCMC convergence in Bayesian  
510 phylogenetics. *Bioinformatics.* 24(4): 581-583.
- 511 Paradis E., Claude J., Strimmer K. 2004. APE: analyses of phylogenetics and evolution in R  
512 language. *Bioinformatics.* 20: 289-290.
- 513 Pease J.B., Haak D.C., Hahn M.W., Moyle L.C. 2016. Phylogenomics reveals three sources of  
514 adaptive variation during a rapid radiation. *PLOS Biol* 14(2): e1002379.
- 515 Philippe H., Brinkmann H., Lartillot N. 2005. Phylogenomics. *Annu. Rev. Ecol. Evol. Syst.*  
516 36:541–562.
- 517 Philippe H., Derelle R., Lopez P., Pick K., Borchiellini C., Boury-Esnault N., Vacelet J., Renard  
518 E., Houliston E., Quéinnec E., Da Silva C., Wincker P., Le Guyader H., Leys S., Jackson  
519 D. J., Schreiber F., Erpenbeck D., Morgenstern B., Wörheide G., and Manuel M. 2009.



- 520 Phylogenomics revives traditional views on deep animal relationships. *Curr. Biol.*  
521 19:706–712.
- 522 Philippe H., Brinkman H., Lavrov D.V., Littlewood D.T.J., Manuel M., Worheide. W, Baurain  
523 D. 2011. Resolving difficult phylogenetic questions: why more sequences are not enough.  
524 *PLoS Biol.* 9: e1000602.
- 525 Phillips M. J., Delsuc F., Penny D. 2004. Genome-scale phylogeny and the detection of  
526 systematic biases. *Mol. Biol. Evol.* 21:1455–1468.
- 527 Pollard D.A., Iyer V.N., Moses A.M., Eisen M.B. 2006. Widespread discordance of gene trees  
528 with species tree in *Drosophila*: evidence for incomplete lineage sorting. *PLoS Genet.* 2:  
529 e173.
- 530 Rambaut A., Grassly N.C. 1997. Seq-Gen: an application for the Monte Carlo simulation of  
531 DNA sequence evolution along phylogenetic trees. *Comput. Appl. Biosci.* 13:235-238.
- 532 Rambaut A., Suchard M.A., Xie D., Drummond A.J. 2014. Tracer v1.6, available from  
533 <http://beast.bio.ed.ac.uk/Tracer>
- 534 R Core Team. 2015. R: A language and environment for statistical computing. R Foundation for  
535 Statistical Computing, Vienna, Austria. URL <https://www.R-project.org/>.
- 536 Reid N.M., Hird S.M., Brown J.M. Pelletier T.A. McVay J.D., Salter J.D., and Carstens B.C.  
537 2014 Poor fit to multispecies coalescent is widely detectable in empirical data. *Syst. Biol.*  
538 63:322-333.

- 539 Ripplinger J, Sullivan J. 2010. Assessment of substitution model adequacy using frequentists and  
540 Bayesian methods. *Mol. Biol. Evol.* 27:2790-2803.
- 541 Robinson D.F., Foulds L.R. 1981. Comparison of phylogenetic trees. *Math. Biosci.* 53:131-147.
- 542 Rodrigue N., Kleinman C.L., Philippe H., Lartillot N. 2009. Computational methods for  
543 evaluating phylogenetic models of coding sequence evolution with dependence between  
544 codons. *Mol. Biol. Evol.* 26:1663-1676.
- 545 Rokas A., Williams B. L., King N., and Carroll S. B. 2003. Genome-scale approaches to  
546 resolving incongruence in molecular phylogenies. *Nature* 425:798–804.
- 547 Rokas A. and Carroll S. B. 2005. More genes or more taxa? The relative contribution of gene  
548 number and taxon number to phylogenetic accuracy. *Mol. Biol. Evol.* 22: 1337-1344.
- 549 Ronquist F., Teslenko M., van der Mark P., Ayres D.L., Darling A., Höhna S., Larget B., Liu, L.,  
550 M.A. Suchard, Huelsenbeck J.P. 2012. Mr.Bayes3.2: Efficient bayesian phylogenetic  
551 inference and model choice across a large model space. *Syst. Biol.* 61:539-542.
- 552 Salichos L., Rokas A. 2013. Inferring ancient divergences requires genes with strong  
553 phylogenetic signals. *Nature.* 497: 327-333.
- 554 Schierwater, B., Eitel M., Jakob W., Osigus H.-J., Hadrys H., Dellaporta S. L., Kolokotronis S.-  
555 O, Desalle R. 2009. Concatenated analysis sheds light on early metazoan evolution and  
556 fuels a modern “urmetazoon” hypothesis. *PLoS Biol.* 7:e20.

- 557 Scornavacca C., Galtier N. 2017. Incomplete lineage sorting in mammalian phylogenomics. *Syst.*  
558 *Biol.* 66:112-120.
- 559 Shaffer H.B., McCartney-Melstad E., Near T.J., Mount G., Spinks P.Q. 2017. Phylogenomic  
560 analyses of 539 highly informative loci dates a fully resolved time tree for the major  
561 clades of living turtles (Testudines). *Mol Phylogenet Evol.* in press.
- 562 Slater G.J., Pennell M.W. 2014 Robust regression and posterior predictive simulation increase  
563 power to detect early bursts of trait evolution. *Syst. Biol.* 63:293-308.
- 564 Song S., Liu L., Edwards S.V., Wu S. 2012. Resolving conflict in eutherian mammal phylogeny  
565 using phylogenomics and the multispecies coalescent model. *Proc. Nat. Acad. Sci.* 109:  
566 14942-14947.
- 567 Sullivan J., Swofford D.L. 2001. Are guinea pigs rodents? The importance of adequate models in  
568 molecular phylogenetics. *J. Mol. Evol.* 36:445-466.
- 569 Sullivan J., Joyce P. 2005. Model Selection in Phylogenetics. *Annu. Rev. Ecol. Evol. Syst.*  
570 36:445–466.
- 571 Swofford D.L. 2003. PAUP\*. Phylogenetic Analysis Using Parsimony (\*and Other Methods).  
572 Available at: <http://paup.csit.fsu.edu>.
- 573 Swofford D.L., Waddell P.J. , Huelsenbeck J.P. , Foster P.G., Lewis P.O., Roger J.S. 2001. Bias  
574 in phylogenetic estimation and its relevance to the choice between parsimony and  
575 likelihood methods. *Syst. Biol.* 50:525-539.
- 576 Szollosi G.J., Tannier E., Daubin V., Boussau B. 2015. The Inference of Gene Trees with  
577 Species Trees. *Syst. Biol.* 64: e42–e62.

- 578 Thomson, R.C., Shaffer, H.B., 2010. Sparse supermatrices for phylogenetic inference: taxonomy,  
579 alignment, rogue taxa, and the phylogeny of living turtles. *Syst. Biol.* 59: 42–58.
- 580 Warren, D.L., Geneva A.J, Lanfear R. 2017. RWTY (R We There Yet): An R Package for  
581 Examining Convergence of Bayesian Phylogenetic Analyses. *Mol. Biol. Evol.* 34:1016-  
582 1020.
- 583 Whelan N.V., Kocot K.M., Moroz L.L., Halanych K.M. 2015. Error, signal, and the placement  
584 of Ctenophora sister to all other animals. *Proc. Nat. Acad. Sci.*  
585 doi:10.1073/pnas.1503453112.
- 586 Whidden C., and Matsen F.A. 2015 Quantifying MCMC exploration of phylogenetic tree space.  
587 *Syst. Biol.* Doi:10.1093/sysbio/syv006.
- 588 White D.L., Wolff J.N., Pierson M., Gemmell N.J. 2008. Revealing the hidden complexities of  
589 mtDNA inheritance. *Mol. Ecol.* 17: 4925-4942.
- 590 Wickham H. 2009. *Ggplot2: elegant graphics for data analysis.* Spring-Verlag New York.
- 591 Wilgenbusch J.C., Huang W., Gallivan K.A. 2017. Visualizing phylogenetic tree landscapes.  
592 *BMC Bioinformatics* 18:85.
- 593 Wong A., Jensen J.D., Pool J.E., Aquadro C.F. 2007. Phylogenetic incongruence in the  
594 *Drosophila melanogaster* species group. *Mol. Phyl. Evol.* 43: 1138-1150.
- 595 Yang Z. 1994. Maximum likelihood phylogenetic estimation from DNA sequences with variable  
596 rates over sites: approximate methods. *J. Mol. Evol.* 39:306-314.
- 597 Zhang B., Liu L., Yan Z., Penny D. 2014. Origin of land plants using multispecies coalescent  
598 model. *Trends Plant Sci.* 18:492-495.

599

600

601 Figure 1. The total number of pairwise incompatibilities among all gene trees for the six datasets.  
602 Distances are shown between maximum clade credibility (MCC) trees, majority-rule consensus  
603 trees (MRC) and 95% consensus (95C) trees. The circle represents the mean number of  
604 incompatibilities and the black bars around it represent one standard deviation around the mean.  
605 The width of the violin plot indicates the density of gene trees with a particular tree-to-tree  
606 distance to another gene tree in the dataset. There is extensive variation in topology among gene  
607 trees in each clade and across summary tree types, with the exception of some 95% consensus  
608 gene trees in the Crocodylian, Turtles, and Squamates datasets.

609

610 Figure 2. Two-dimensional NLDR representations of treespace for thirteen mitochondrial genes  
611 based on RF distances between trees. Each point represents a tree taken from the  
612 posterior distribution of a given gene.

613

614 Figure 3. Heatmap of the Spearman's rank correlation coefficient between gene rankings among  
615 model performance tests based on posterior predictive effect sizes. Model performance tests  
616 include multinomial likelihood (ML), composition heterogeneity (X2), tree length mean (TLM),  
617 tree length variance (TLV), statistical entropy (E), interquartile range (IQR), first quartile (First),  
618 median, third quartile (Third), 99th percentile (Q99), 999th-1000 quantile (Q999), 9999-10000th  
619 quantile (Q9999) of tree to tree distances in posterior distributions. Stars indicate correlations  
620 that are significant at a significance threshold of 0.05 (\*), 0.01 (\*\*), and 0.001(\*\*\*)

621

622 Figure 4. Relationship between PPES and the number of incompatibilities between 95%  
623 consensus gene tree and reference tree based on linear regression. Correlations with significantly  
624 positive or negative slopes are represented by (+\*) and (-\*) respectively. The values of the slope  
625 and 95% confidence intervals are provided in Supplementary Table 11.

626

627 Figure 5. The PPES for each gene from a subset of model performance tests that highlight issues  
628 in the analysis. A) In the Squamate dataset, the PPES (before the misalignment was corrected)  
629 associated with the tree length mean and variance test for the CYTB alignment are much larger  
630 than for the other genes. B) In the Turtle dataset, the PPES associated with the quantile-based  
631 model performance tests of the ND5 alignment are twice as large as the PPES for ND3, the gene  
632 with the next largest PPES. Model performance tests shown here are the multinomial likelihood  
633 (ML), tree length mean (TLM), tree length variance (TLV), 99<sup>th</sup> percentile (Q99), 999<sup>th</sup>-1,000  
634 quantile (Q999), 9999-10,000<sup>th</sup> quantile (Q9999) of tree-to-tree distances in posterior  
635 distributions.

636

637

638

639

640

641

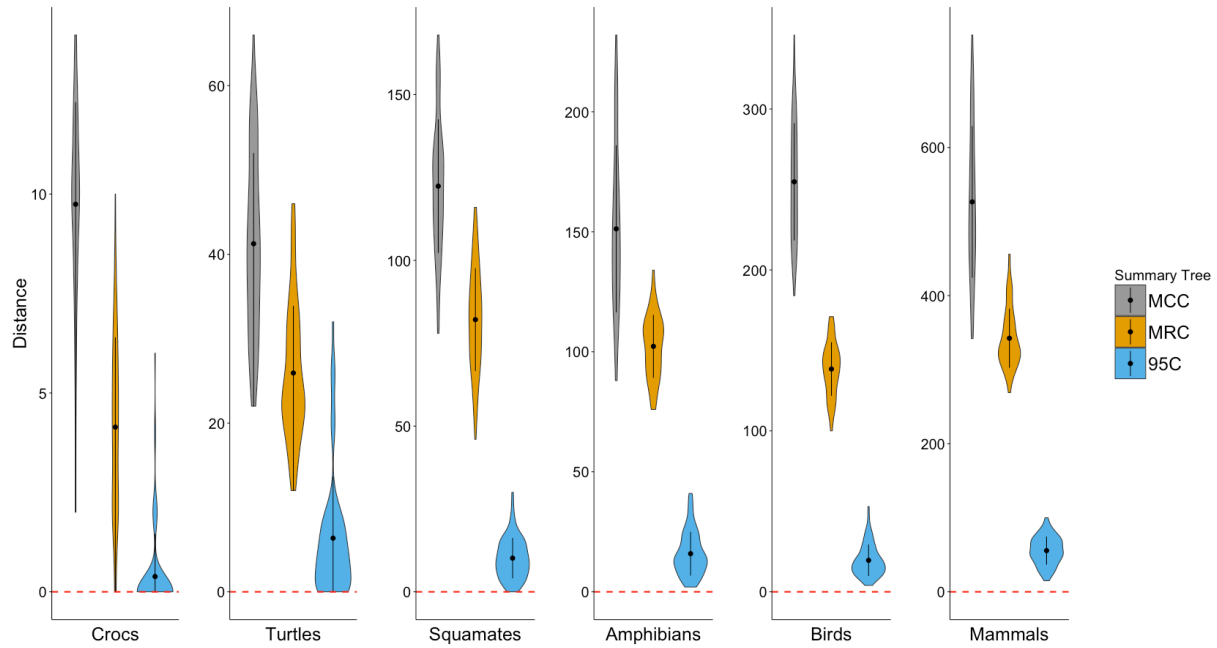

Fig 1.

642

643

644

645

646

647

648

649

650

651

652

653

654

655

656

657

658

659

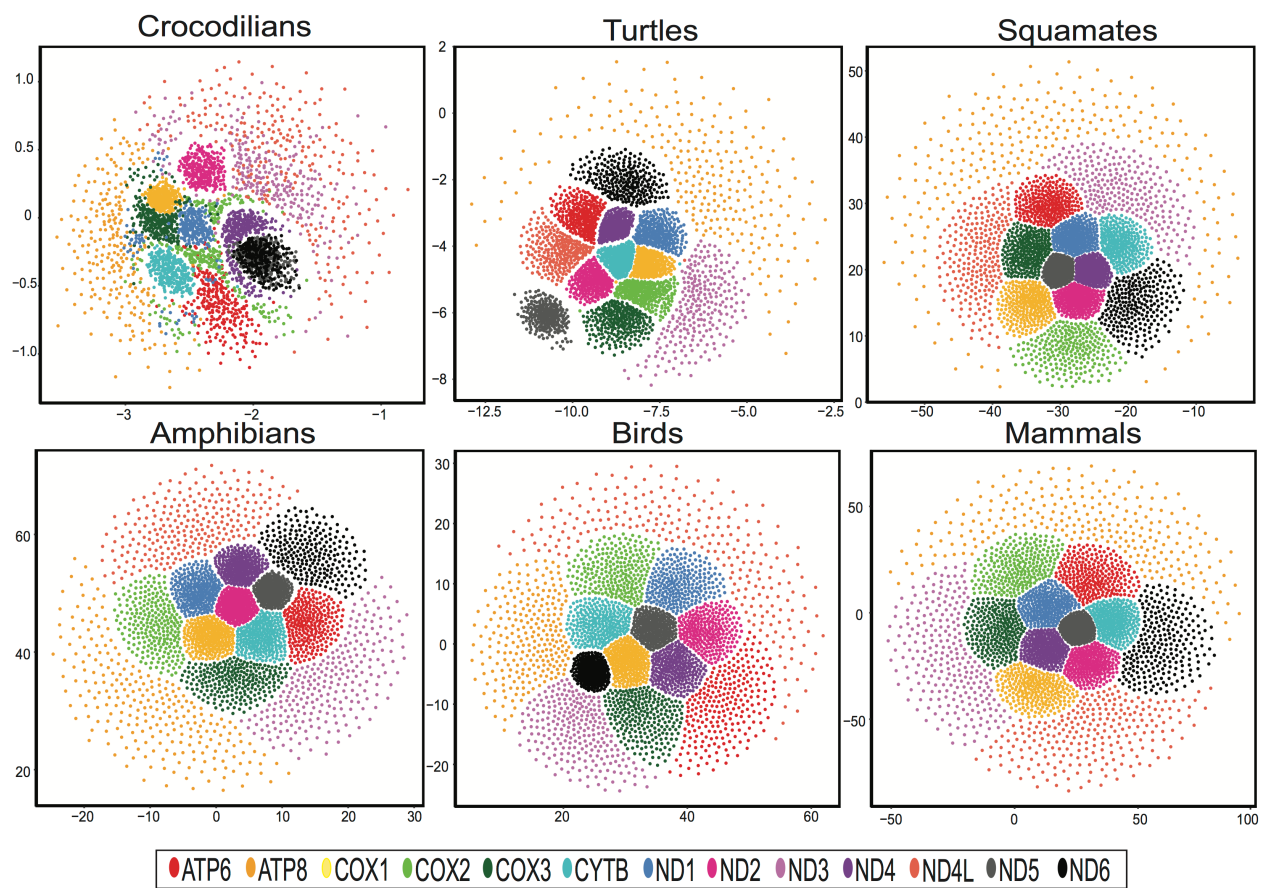

660  
661 Fig 2.



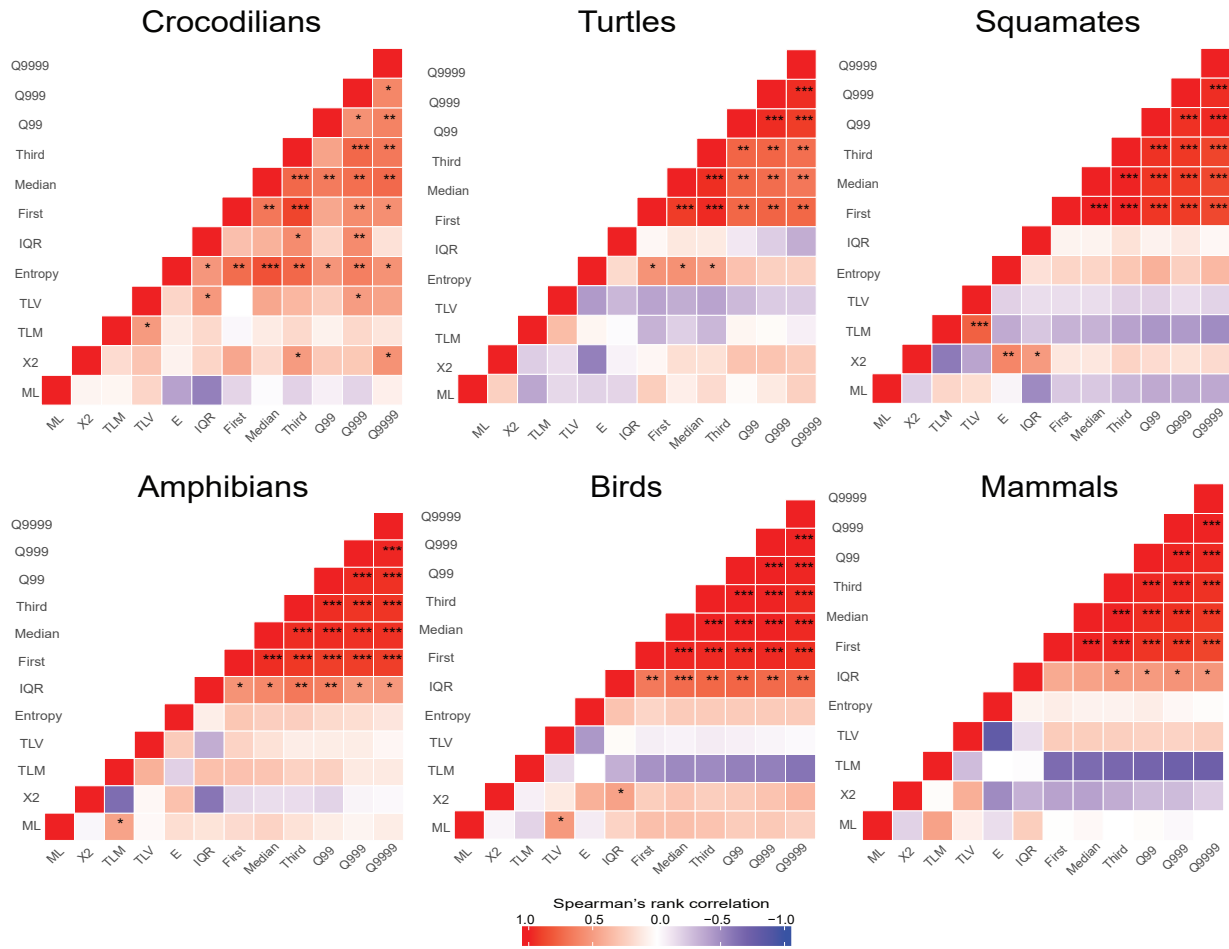

662  
663 Fig 3.

664

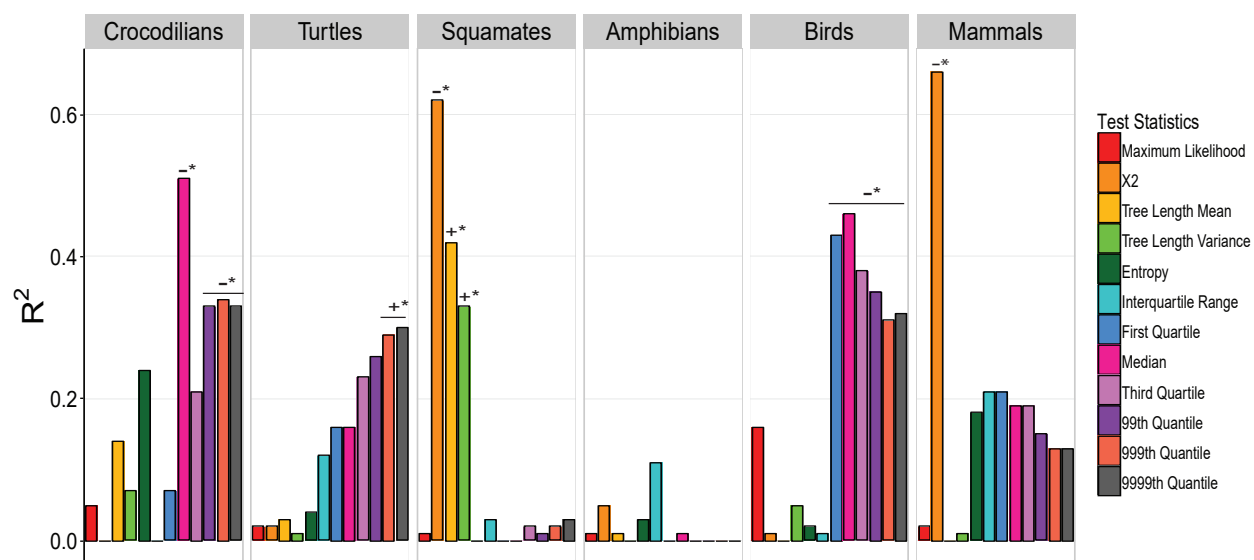

665  
666 Fig 4.

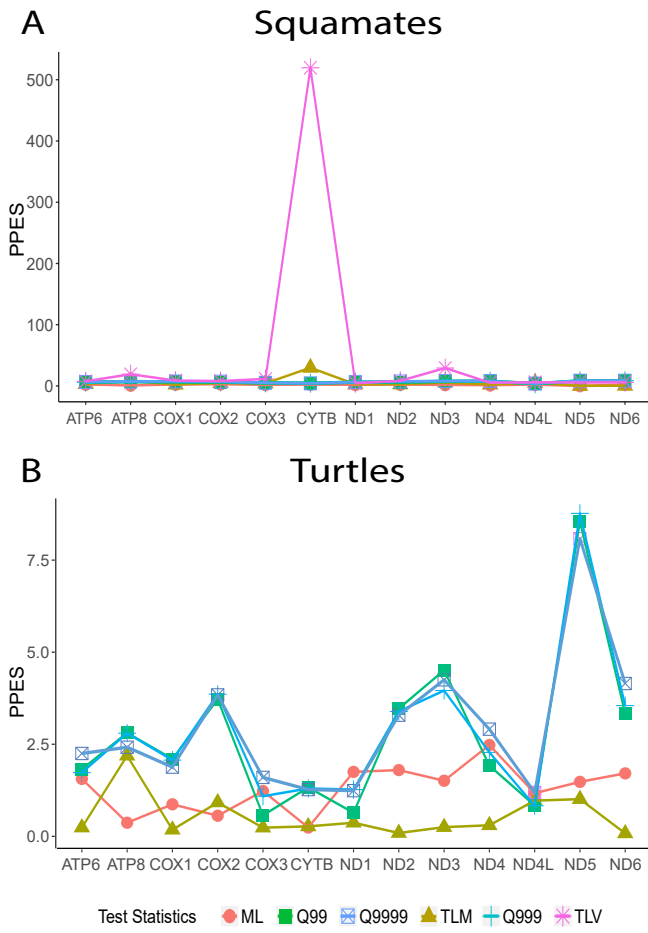

667  
668 Fig 5.  
669  
670  
671  
672  
673  
674  
675  
676  
677  
678  
679  
680  
681  
682  
683

684 Table 1. Descriptions of the model performance test statistics employed in this study. The type of  
 685 test statistic refers to whether they are values based on the data themselves or the resulting  
 686 inferences.

| Test Statistics                | Type      | Description                                                                                                                                                                                  | Source                                                               |
|--------------------------------|-----------|----------------------------------------------------------------------------------------------------------------------------------------------------------------------------------------------|----------------------------------------------------------------------|
| Multinomial likelihood         | Data      | Related to the frequency of site patterns in an alignment                                                                                                                                    | (Goldman 1993; Bollback 2002) (Huelsenbeck et al. 2001; Foster 2004) |
| X2                             | Data      | Captures variation in nucleotide frequencies                                                                                                                                                 | (Brown 2014)                                                         |
| Tree length mean               | Inference | The mean of marginal distributions of tree length                                                                                                                                            | (Brown 2014)                                                         |
| Tree length variance           | Inference | The variance of marginal distributions of tree length                                                                                                                                        | (Brown 2014)                                                         |
| Entropy                        | Inference | The unevenness of support in the posterior distribution of trees                                                                                                                             | (Brown 2014)                                                         |
| Quantile-based test statistics | Inference | The overall similarity in the posterior distributions of trees based on the dispersion of trees in the posterior. Can be assessed at different positions along the distribution (see below). | (Brown 2014)                                                         |
| Inter-quartile Range           | Inference | The interquartile range of tree-to-tree distances                                                                                                                                            | (Brown 2014)                                                         |
| First quartile                 | Inference | The first quartile of tree-to-tree distances                                                                                                                                                 | (Brown 2014)                                                         |
| Median                         | Inference | The median of tree-to-tree distances                                                                                                                                                         | (Brown 2014)                                                         |
| Third quartile                 | Inference | The third quartile tree-to-tree distances                                                                                                                                                    | (Brown 2014)                                                         |
| 99 <sup>th</sup> percentile    | Inference | The 99 <sup>th</sup> percentile of tree-to-tree distances                                                                                                                                    | (Brown 2014)                                                         |
| 999 <sup>th</sup> quantile     | Inference | The 999-1,000 <sup>th</sup> quantile of tree-to-tree distances                                                                                                                               | (Brown 2014)                                                         |
| 9,999 <sup>th</sup> quantile   | Inference | The 9999-10,000 <sup>th</sup> quantile of tree-to-tree distances                                                                                                                             | (Brown 2014)                                                         |

687

688  
 689  
 690  
 691  
 692  
 693  
 694  
 695  
 696  
 697  
 698  
 699  
 700

701 Table 2. Gene tree variation found in this study compared to several other studies that focused on  
702 gene tree heterogeneity using multiple nuclear loci.

| Dataset           | Taxa | Genes | Distinct Trees | Percent of possible trees found | Source                  |
|-------------------|------|-------|----------------|---------------------------------|-------------------------|
| Crocodylians      | 20   | 13    | 12             | 92                              | This study              |
| Turtles           | 53   | 13    | 13             | 100                             | This study              |
| Squamates         | 120  | 13    | 13             | 100                             | This study              |
| Amphibians        | 157  | 13    | 13             | 100                             | This study              |
| Birds             | 253  | 13    | 13             | 100                             | This study              |
| Mammals           | 575  | 13    | 13             | 100                             | This study              |
| Yeast             | 23   | 1070  | 1070           | 100                             | Salichos and Rokas 2013 |
| Vertebrates       | 18   | 1086  | 299            | 28                              | Salichos and Rokas 2013 |
| Metazoans         | 21   | 225   | 224            | 99.5                            | Salichos and Rokas 2013 |
| Eutherian Mammals | 37   | 447   | 440            | 98.3                            | Song et al. 2012        |
| Land Plants       | 32   | 184   | 182            | 98.9                            | Zhong et al. 2013       |
| Tomatoes          | 29   | 2745  | 2743           | 99.9                            | Pease et al. 2016       |

703

704

705

706

707

708

709

710

711

712

713

714 Table 3. The distribution of posterior predictive effect sizes (PPES) for each of the 12 model  
 715 performance test statistics used in this study (Table 1) summarized across all six datasets.

| Test Statistic              | Mean                  | St. Dev.              | Median | Min   | Max                   |
|-----------------------------|-----------------------|-----------------------|--------|-------|-----------------------|
| Multinomial likelihood      | 1.65                  | 1.64                  | 1.42   | 0.002 | 11.4                  |
| X2                          | 19.61                 | 23.48                 | 11.7   | 0.04  | 110.68                |
| Tree length mean            | 1.91                  | 1.85                  | 1.35   | 0.026 | 8.21                  |
| Tree length variance        | 5.45                  | 6.52                  | 3.45   | 0.33  | 32.76                 |
| Entropy                     | 6.61x10 <sup>10</sup> | 2.48x10 <sup>11</sup> | 0.96   | 0     | 1.12x10 <sup>12</sup> |
| Interquartile range         | 4.82                  | 3.41                  | 4.31   | 0     | 16.24                 |
| 1 <sup>st</sup> quartile    | 4.77                  | 3.02                  | 4.9    | 0     | 11.73                 |
| Median                      | 4.95                  | 3.16                  | 5.19   | 0     | 12.28                 |
| 3 <sup>rd</sup> quartile    | 5.19                  | 3.09                  | 5.37   | 0     | 12.65                 |
| 99 <sup>th</sup> quantile   | 5.58                  | 3.29                  | 5.93   | 0     | 13.44                 |
| 999 <sup>th</sup> quantile  | 5.73                  | 3.36                  | 6.12   | 0     | 13.82                 |
| 9999 <sup>th</sup> quantile | 5.79                  | 3.35                  | 6.27   | 0     | 13.89                 |

716

717

718

719

720

721

722

723

724

725

726

727

728 Table 4. The distribution of posterior predictive effect sizes (PPES) for each dataset across 11 of  
729 the 12 test statistics. Entropy was removed from the pool of test statistics summarized in this  
730 table because of the extreme outlier PPES of this test statistic across the majority of the datasets  
731 (see text). The PPES for entropy test statistic are provided in Supplementary Tables 4-9.

| Dataset    | Data-based test statistics |          |        |       |        | Inference-based test statistics |          |        |      |       |
|------------|----------------------------|----------|--------|-------|--------|---------------------------------|----------|--------|------|-------|
|            | Mean                       | St. Dev. | Median | Min   | Max    | Mean                            | St. Dev. | Median | Min  | Max   |
| Crocs      | 4.15                       | 4.57     | 1.58   | 0.16  | 13.92  | 1.05                            | 0.78     | 1.03   | 0    | 3.16  |
| Turtles    | 3.48                       | 4.02     | 1.78   | 0.04  | 15.08  | 2.21                            | 2.04     | 1.97   | 0    | 14.25 |
| Squamates  | 12.29                      | 14.77    | 3.05   | 0.002 | 49.1   | 6.15                            | 3.04     | 6.14   | 0.21 | 28.54 |
| Amphibians | 27.82                      | 36.06    | 5.58   | 0.09  | 110.68 | 5.99                            | 2.37     | 5.67   | 1.47 | 18.08 |
| Birds      | 5.29                       | 6.17     | 1.86   | 0.09  | 21.46  | 5.19                            | 2.37     | 5.47   | 0.07 | 10.81 |
| Mammals    | 10.77                      | 13.39    | 8.63   | 0.13  | 45.89  | 8.63                            | 3.99     | 9.62   | 0.87 | 16.24 |

732

733

734

735

736

737

738

739

740

741

742

743

744

745

746

747

748

749 Table 5. The percentage of bipartitions agreed upon by gene trees and reference trees for each  
750 clade. The number of taxa in each dataset after trimming is provided in parentheses. The  
751 percentage of bipartitions agreed upon was calculated the number of compatible nodes divided  
752 by the total number of nodes in the tree.

| <b>Gene</b> | <b>Crocs (20)</b> | <b>Turtles (49)</b> | <b>Squamates (35)</b> | <b>Amphibians (28)</b> | <b>Birds (33)</b> | <b>Mammals (104)</b> |
|-------------|-------------------|---------------------|-----------------------|------------------------|-------------------|----------------------|
| ATP6        | 95                | 88                  | 77                    | 96                     | 97                | 88                   |
| ATP8        | 95                | 98                  | 94                    | 96                     | 97                | 99                   |
| COX1        | 95                | 98                  | 83                    | 86                     | 100               | 93                   |
| COX2        | 85                | 98                  | 94                    | 86                     | 94                | 94                   |
| COX3        | 95                | 92                  | 89                    | 93                     | 97                | 91                   |
| CYTB        | 90                | 92                  | 97                    | 100                    | 100               | 83                   |
| ND1         | 95                | 98                  | 94                    | 100                    | 97                | 87                   |
| ND2         | 90                | 100                 | 80                    | 89                     | 97                | 90                   |
| ND3         | 95                | 96                  | 97                    | 96                     | 97                | 96                   |
| ND4         | 90                | 90                  | 94                    | 96                     | 100               | 89                   |
| ND4L        | 95                | 84                  | 100                   | 96                     | 100               | 98                   |
| ND5         | 90                | 67                  | 86                    | 89                     | 97                | 74                   |
| ND6         | 95                | 96                  | 97                    | 93                     | 100               | 90                   |

753

754

755
